# Supplementary material for: Vanadium(V) hydrazido(2−) thiolate imine alkoxide complexes
Source: Royal Society of Chemistry journal article supplement (doi:10.1039/b718968k), 2008-01-01
Supplement: b718968k.pdf [file b718968k.pdf]

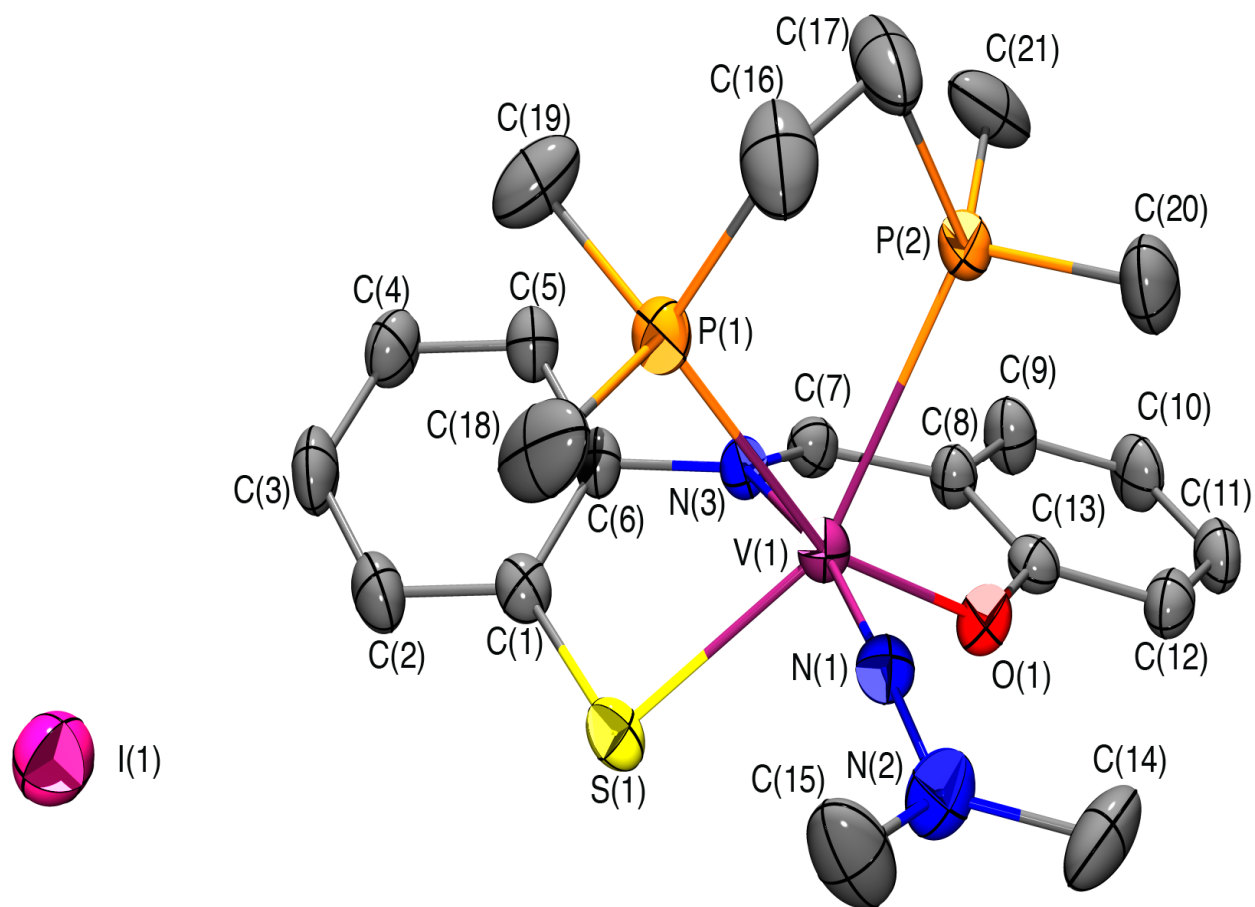

Table 1. Crystal data and structure refinement for odomsb920\_0m.

|                                   |                                                                       |          |
|-----------------------------------|-----------------------------------------------------------------------|----------|
| Identification code               | odomsb920_0m                                                          |          |
| Empirical formula                 | C <sub>21</sub> H <sub>31</sub> I N <sub>3</sub> O P <sub>2</sub> S V |          |
| Formula weight                    | 613.33                                                                |          |
| Temperature                       | 173(2) K                                                              |          |
| Wavelength                        | 0.71073 Å                                                             |          |
| Crystal system                    | Orthorhombic                                                          |          |
| Space group                       | Pbca                                                                  |          |
| Unit cell dimensions              | a = 10.8685(2) Å                                                      | α = 90°. |
|                                   | b = 18.3385(3) Å                                                      | β = 90°. |
|                                   | c = 26.2108(5) Å                                                      | γ = 90°. |
| Volume                            | 5224.13(16) Å <sup>3</sup>                                            |          |
| Z                                 | 8                                                                     |          |
| Density (calculated)              | 1.560 Mg/m <sup>3</sup>                                               |          |
| Absorption coefficient            | 1.782 mm <sup>-1</sup>                                                |          |
| F(000)                            | 2464                                                                  |          |
| Crystal size                      | 0.28 x 0.12 x 0.10 mm <sup>3</sup>                                    |          |
| Theta range for data collection   | 2.22 to 27.90°.                                                       |          |
| Index ranges                      | -12 ≤ h ≤ 14, -24 ≤ k ≤ 24, -31 ≤ l ≤ 33                              |          |
| Reflections collected             | 67170                                                                 |          |
| Independent reflections           | 6199 [R(int) = 0.0556]                                                |          |
| Completeness to theta = 25.00°    | 100.0 %                                                               |          |
| Absorption correction             | None                                                                  |          |
| Refinement method                 | Full-matrix least-squares on F <sup>2</sup>                           |          |
| Data / restraints / parameters    | 6199 / 0 / 277                                                        |          |
| Goodness-of-fit on F <sup>2</sup> | 1.019                                                                 |          |
| Final R indices [I > 2σ(I)]       | R1 = 0.0325, wR2 = 0.0627                                             |          |
| R indices (all data)              | R1 = 0.0566, wR2 = 0.0701                                             |          |
| Largest diff. peak and hole       | 0.689 and -0.471 e.Å <sup>-3</sup>                                    |          |

Table 2. Atomic coordinates ( $\times 10^4$ ) and equivalent isotropic displacement parameters ( $\text{\AA}^2 \times 10^3$ ) for odomsb920\_0m.  $U(\text{eq})$  is defined as one third of the trace of the orthogonalized  $U^{ij}$  tensor.

|       | x        | y       | z       | $U(\text{eq})$ |
|-------|----------|---------|---------|----------------|
| V(1)  | 7765(1)  | 4141(1) | 3509(1) | 22(1)          |
| S(1)  | 8030(1)  | 5259(1) | 3094(1) | 29(1)          |
| P(1)  | 7387(1)  | 4955(1) | 4262(1) | 29(1)          |
| P(2)  | 7751(1)  | 3304(1) | 4266(1) | 29(1)          |
| O(1)  | 8064(2)  | 3256(1) | 3147(1) | 26(1)          |
| N(1)  | 6231(2)  | 4125(1) | 3388(1) | 25(1)          |
| N(2)  | 5130(2)  | 4083(1) | 3203(1) | 36(1)          |
| N(3)  | 9749(2)  | 4223(1) | 3497(1) | 23(1)          |
| C(1)  | 9483(2)  | 5494(1) | 3342(1) | 26(1)          |
| C(2)  | 9885(3)  | 6216(1) | 3371(1) | 33(1)          |
| C(3)  | 10986(3) | 6381(2) | 3606(1) | 37(1)          |
| C(4)  | 11702(3) | 5833(2) | 3814(1) | 33(1)          |
| C(5)  | 11327(2) | 5111(1) | 3782(1) | 28(1)          |
| C(6)  | 10222(2) | 4945(1) | 3544(1) | 24(1)          |
| C(7)  | 10530(2) | 3710(1) | 3392(1) | 25(1)          |
| C(8)  | 10208(2) | 2978(1) | 3250(1) | 24(1)          |
| C(9)  | 11147(3) | 2458(1) | 3188(1) | 33(1)          |
| C(10) | 10898(3) | 1769(1) | 3015(1) | 35(1)          |
| C(11) | 9693(3)  | 1584(1) | 2891(1) | 32(1)          |
| C(12) | 8754(3)  | 2080(1) | 2941(1) | 29(1)          |
| C(13) | 8990(2)  | 2786(1) | 3121(1) | 24(1)          |
| C(14) | 4677(3)  | 3368(2) | 3052(1) | 51(1)          |
| C(15) | 4278(3)  | 4683(2) | 3263(2) | 54(1)          |
| C(16) | 6605(4)  | 4428(2) | 4757(1) | 57(1)          |
| C(17) | 7287(4)  | 3746(2) | 4857(1) | 65(1)          |
| C(18) | 6357(3)  | 5716(2) | 4177(1) | 57(1)          |
| C(19) | 8688(3)  | 5351(2) | 4581(1) | 49(1)          |
| C(20) | 6690(3)  | 2558(2) | 4189(1) | 43(1)          |
| C(21) | 9183(3)  | 2858(2) | 4440(1) | 52(1)          |
| I(1)  | 1920(1)  | 8379(1) | 4394(1) | 36(1)          |

Table 3. Bond lengths [Å] and angles [°] for odomsb920\_0m.

---

|             |            |
|-------------|------------|
| V(1)-N(1)   | 1.698(2)   |
| V(1)-O(1)   | 1.9081(17) |
| V(1)-N(3)   | 2.162(2)   |
| V(1)-S(1)   | 2.3383(8)  |
| V(1)-P(2)   | 2.5079(8)  |
| V(1)-P(1)   | 2.5078(8)  |
| S(1)-C(1)   | 1.761(3)   |
| P(1)-C(19)  | 1.796(3)   |
| P(1)-C(18)  | 1.803(3)   |
| P(1)-C(16)  | 1.827(3)   |
| P(2)-C(20)  | 1.801(3)   |
| P(2)-C(21)  | 1.817(3)   |
| P(2)-C(17)  | 1.820(3)   |
| O(1)-C(13)  | 1.328(3)   |
| N(1)-N(2)   | 1.293(3)   |
| N(2)-C(15)  | 1.447(4)   |
| N(2)-C(14)  | 1.455(4)   |
| N(3)-C(7)   | 1.298(3)   |
| N(3)-C(6)   | 1.425(3)   |
| C(1)-C(6)   | 1.393(4)   |
| C(1)-C(2)   | 1.396(4)   |
| C(2)-C(3)   | 1.380(4)   |
| C(3)-C(4)   | 1.382(4)   |
| C(4)-C(5)   | 1.389(4)   |
| C(5)-C(6)   | 1.387(4)   |
| C(7)-C(8)   | 1.437(3)   |
| C(8)-C(9)   | 1.405(3)   |
| C(8)-C(13)  | 1.411(4)   |
| C(9)-C(10)  | 1.370(4)   |
| C(10)-C(11) | 1.392(4)   |
| C(11)-C(12) | 1.373(4)   |
| C(12)-C(13) | 1.402(4)   |
| C(16)-C(17) | 1.477(5)   |

Electronic Supplementary Information for Dalton Transactions  
This journal is © The Royal Society of Chemistry 2008

|                  |            |
|------------------|------------|
| N(1)-V(1)-O(1)   | 93.40(9)   |
| N(1)-V(1)-N(3)   | 167.99(9)  |
| O(1)-V(1)-N(3)   | 83.22(8)   |
| N(1)-V(1)-S(1)   | 92.79(8)   |
| O(1)-V(1)-S(1)   | 119.53(6)  |
| N(3)-V(1)-S(1)   | 79.03(6)   |
| N(1)-V(1)-P(2)   | 97.55(8)   |
| O(1)-V(1)-P(2)   | 82.74(6)   |
| N(3)-V(1)-P(2)   | 93.46(6)   |
| S(1)-V(1)-P(2)   | 154.89(3)  |
| N(1)-V(1)-P(1)   | 89.81(8)   |
| O(1)-V(1)-P(1)   | 157.76(6)  |
| N(3)-V(1)-P(1)   | 97.69(6)   |
| S(1)-V(1)-P(1)   | 82.23(3)   |
| P(2)-V(1)-P(1)   | 75.02(3)   |
| C(1)-S(1)-V(1)   | 98.82(9)   |
| C(19)-P(1)-C(18) | 103.56(17) |
| C(19)-P(1)-C(16) | 104.47(18) |
| C(18)-P(1)-C(16) | 102.08(18) |
| C(19)-P(1)-V(1)  | 118.51(11) |
| C(18)-P(1)-V(1)  | 117.69(11) |
| C(16)-P(1)-V(1)  | 108.62(11) |
| C(20)-P(2)-C(21) | 103.56(16) |
| C(20)-P(2)-C(17) | 104.85(17) |
| C(21)-P(2)-C(17) | 102.90(19) |
| C(20)-P(2)-V(1)  | 112.39(11) |
| C(21)-P(2)-V(1)  | 117.99(10) |
| C(17)-P(2)-V(1)  | 113.73(11) |
| C(13)-O(1)-V(1)  | 135.01(16) |
| N(2)-N(1)-V(1)   | 168.5(2)   |
| N(1)-N(2)-C(15)  | 120.3(2)   |
| N(1)-N(2)-C(14)  | 118.0(2)   |
| C(15)-N(2)-C(14) | 119.9(2)   |
| C(7)-N(3)-C(6)   | 117.1(2)   |
| C(7)-N(3)-V(1)   | 127.25(17) |
| C(6)-N(3)-V(1)   | 115.05(16) |

|                   |            |
|-------------------|------------|
| C(6)-C(1)-C(2)    | 119.0(2)   |
| C(6)-C(1)-S(1)    | 118.70(19) |
| C(2)-C(1)-S(1)    | 122.2(2)   |
| C(3)-C(2)-C(1)    | 120.3(3)   |
| C(2)-C(3)-C(4)    | 120.3(3)   |
| C(3)-C(4)-C(5)    | 120.3(3)   |
| C(6)-C(5)-C(4)    | 119.4(3)   |
| C(5)-C(6)-C(1)    | 120.8(2)   |
| C(5)-C(6)-N(3)    | 123.7(2)   |
| C(1)-C(6)-N(3)    | 115.5(2)   |
| N(3)-C(7)-C(8)    | 125.0(2)   |
| C(9)-C(8)-C(13)   | 119.0(2)   |
| C(9)-C(8)-C(7)    | 119.1(2)   |
| C(13)-C(8)-C(7)   | 121.6(2)   |
| C(10)-C(9)-C(8)   | 121.4(3)   |
| C(9)-C(10)-C(11)  | 119.2(3)   |
| C(12)-C(11)-C(10) | 121.0(3)   |
| C(11)-C(12)-C(13) | 120.5(3)   |
| O(1)-C(13)-C(12)  | 118.6(2)   |
| O(1)-C(13)-C(8)   | 122.5(2)   |
| C(12)-C(13)-C(8)  | 118.9(2)   |
| C(17)-C(16)-P(1)  | 110.0(2)   |
| C(16)-C(17)-P(2)  | 111.4(2)   |

---

Symmetry transformations used to generate equivalent atoms:

Table 4. Anisotropic displacement parameters ( $\text{\AA}^2 \times 10^3$ ) for odomsb920\_0m. The anisotropic displacement factor exponent takes the form:  $-2\pi^2 [ h^2 a^{*2} U^{11} + \dots + 2 h k a^* b^* U^{12} ]$

|       | U <sup>11</sup> | U <sup>22</sup> | U <sup>33</sup> | U <sup>23</sup> | U <sup>13</sup> | U <sup>12</sup> |
|-------|-----------------|-----------------|-----------------|-----------------|-----------------|-----------------|
| V(1)  | 19(1)           | 24(1)           | 23(1)           | 0(1)            | 1(1)            | 1(1)            |
| S(1)  | 26(1)           | 29(1)           | 33(1)           | 7(1)            | 0(1)            | 4(1)            |
| P(1)  | 31(1)           | 29(1)           | 27(1)           | -2(1)           | 4(1)            | 4(1)            |
| P(2)  | 36(1)           | 27(1)           | 25(1)           | 2(1)            | 1(1)            | -5(1)           |
| O(1)  | 21(1)           | 29(1)           | 28(1)           | -4(1)           | 0(1)            | 2(1)            |
| N(1)  | 23(1)           | 29(1)           | 23(1)           | 1(1)            | 1(1)            | 1(1)            |
| N(2)  | 19(1)           | 44(2)           | 44(2)           | -3(1)           | -5(1)           | -1(1)           |
| N(3)  | 22(1)           | 23(1)           | 25(1)           | 1(1)            | 0(1)            | 0(1)            |
| C(1)  | 25(1)           | 29(1)           | 24(1)           | 1(1)            | 7(1)            | 1(1)            |
| C(2)  | 39(2)           | 24(1)           | 35(2)           | 3(1)            | 7(1)            | 3(1)            |
| C(3)  | 45(2)           | 24(1)           | 41(2)           | -2(1)           | 9(2)            | -9(1)           |
| C(4)  | 29(2)           | 36(2)           | 35(2)           | -4(1)           | 1(1)            | -6(1)           |
| C(5)  | 25(2)           | 28(1)           | 32(2)           | -1(1)           | 5(1)            | 0(1)            |
| C(6)  | 25(1)           | 22(1)           | 26(2)           | -2(1)           | 5(1)            | -2(1)           |
| C(7)  | 21(1)           | 28(1)           | 26(2)           | 1(1)            | -3(1)           | 0(1)            |
| C(8)  | 23(1)           | 23(1)           | 27(2)           | 0(1)            | -1(1)           | 1(1)            |
| C(9)  | 26(2)           | 29(1)           | 42(2)           | 2(1)            | -1(1)           | 4(1)            |
| C(10) | 39(2)           | 25(2)           | 40(2)           | -1(1)           | 1(1)            | 9(1)            |
| C(11) | 42(2)           | 23(1)           | 31(2)           | -2(1)           | 4(1)            | -2(1)           |
| C(12) | 31(2)           | 30(2)           | 25(2)           | -2(1)           | 3(1)            | -5(1)           |
| C(13) | 26(1)           | 26(1)           | 20(1)           | 2(1)            | 2(1)            | 1(1)            |
| C(14) | 44(2)           | 67(2)           | 41(2)           | -22(2)          | 0(2)            | -19(2)          |
| C(15) | 31(2)           | 55(2)           | 76(3)           | 23(2)           | -12(2)          | 7(2)            |
| C(16) | 74(3)           | 49(2)           | 47(2)           | -7(2)           | 32(2)           | -5(2)           |
| C(17) | 130(4)          | 35(2)           | 30(2)           | 0(2)            | 27(2)           | -2(2)           |
| C(18) | 63(2)           | 57(2)           | 50(2)           | -21(2)          | -11(2)          | 31(2)           |
| C(19) | 37(2)           | 74(2)           | 37(2)           | -21(2)          | 0(2)            | 0(2)            |
| C(20) | 42(2)           | 35(2)           | 51(2)           | 5(2)            | 0(2)            | -8(1)           |
| C(21) | 40(2)           | 70(2)           | 46(2)           | 34(2)           | -6(2)           | -7(2)           |
| I(1)  | 41(1)           | 40(1)           | 28(1)           | 3(1)            | 0(1)            | -11(1)          |

Table 5. Hydrogen coordinates ( $\times 10^4$ ) and isotropic displacement parameters ( $\text{\AA}^2 \times 10^3$ )  
for odomsb920\_0m.

|        | x     | y    | z    | U(eq) |
|--------|-------|------|------|-------|
| H(2)   | 9410  | 6587 | 3230 | 39    |
| H(3)   | 11247 | 6863 | 3626 | 44    |
| H(4)   | 12438 | 5949 | 3975 | 40    |
| H(5)   | 11812 | 4742 | 3919 | 34    |
| H(7)   | 11363 | 3824 | 3410 | 30    |
| H(9)   | 11953 | 2584 | 3267 | 39    |
| H(10)  | 11528 | 1429 | 2980 | 42    |
| H(11)  | 9521  | 1117 | 2772 | 38    |
| H(12)  | 7955  | 1946 | 2854 | 35    |
| H(14A) | 5348  | 3080 | 2924 | 76    |
| H(14B) | 4068  | 3423 | 2790 | 76    |
| H(14C) | 4317  | 3129 | 3341 | 76    |
| H(15A) | 3815  | 4618 | 3572 | 81    |
| H(15B) | 3726  | 4695 | 2977 | 81    |
| H(15C) | 4727  | 5133 | 3280 | 81    |
| H(16A) | 6554  | 4713 | 5068 | 68    |
| H(16B) | 5775  | 4313 | 4647 | 68    |
| H(17A) | 6772  | 3416 | 5052 | 78    |
| H(17B) | 8012  | 3854 | 5059 | 78    |
| H(18A) | 6279  | 5977 | 4492 | 85    |
| H(18B) | 5564  | 5540 | 4072 | 85    |
| H(18C) | 6679  | 6036 | 3919 | 85    |
| H(19A) | 9032  | 5729 | 4372 | 74    |
| H(19B) | 9298  | 4981 | 4640 | 74    |
| H(19C) | 8430  | 5553 | 4901 | 74    |
| H(20A) | 6735  | 2244 | 4481 | 64    |
| H(20B) | 6900  | 2286 | 3888 | 64    |
| H(20C) | 5869  | 2745 | 4156 | 64    |
| H(21A) | 9072  | 2596 | 4754 | 78    |
| H(21B) | 9816  | 3218 | 4483 | 78    |





Table 6. Torsion angles [°] for odomsb920\_0m.

---

|                      |             |
|----------------------|-------------|
| N(1)-V(1)-S(1)-C(1)  | 163.52(11)  |
| O(1)-V(1)-S(1)-C(1)  | -100.99(11) |
| N(3)-V(1)-S(1)-C(1)  | -25.34(11)  |
| P(2)-V(1)-S(1)-C(1)  | 49.06(12)   |
| P(1)-V(1)-S(1)-C(1)  | 74.10(9)    |
| N(1)-V(1)-P(1)-C(19) | -171.61(16) |
| O(1)-V(1)-P(1)-C(19) | 89.9(2)     |
| N(3)-V(1)-P(1)-C(19) | -1.02(15)   |
| S(1)-V(1)-P(1)-C(19) | -78.77(14)  |
| P(2)-V(1)-P(1)-C(19) | 90.52(14)   |
| N(1)-V(1)-P(1)-C(18) | -45.71(17)  |
| O(1)-V(1)-P(1)-C(18) | -144.2(2)   |
| N(3)-V(1)-P(1)-C(18) | 124.87(16)  |
| S(1)-V(1)-P(1)-C(18) | 47.13(15)   |
| P(2)-V(1)-P(1)-C(18) | -143.58(16) |
| N(1)-V(1)-P(1)-C(16) | 69.51(16)   |
| O(1)-V(1)-P(1)-C(16) | -29.0(2)    |
| N(3)-V(1)-P(1)-C(16) | -119.90(15) |
| S(1)-V(1)-P(1)-C(16) | 162.35(14)  |
| P(2)-V(1)-P(1)-C(16) | -28.36(14)  |
| N(1)-V(1)-P(2)-C(20) | 38.93(14)   |
| O(1)-V(1)-P(2)-C(20) | -53.56(13)  |
| N(3)-V(1)-P(2)-C(20) | -136.27(13) |
| S(1)-V(1)-P(2)-C(20) | 152.41(13)  |
| P(1)-V(1)-P(2)-C(20) | 126.69(12)  |
| N(1)-V(1)-P(2)-C(21) | 159.34(16)  |
| O(1)-V(1)-P(2)-C(21) | 66.85(15)   |
| N(3)-V(1)-P(2)-C(21) | -15.86(15)  |
| S(1)-V(1)-P(2)-C(21) | -87.18(16)  |
| P(1)-V(1)-P(2)-C(21) | -112.90(14) |
| N(1)-V(1)-P(2)-C(17) | -80.01(18)  |
| O(1)-V(1)-P(2)-C(17) | -172.49(18) |
| N(3)-V(1)-P(2)-C(17) | 104.80(18)  |
| S(1)-V(1)-P(2)-C(17) | 33.48(19)   |

Electronic Supplementary Information for Dalton Transactions  
This journal is © The Royal Society of Chemistry 2008

|                      |             |
|----------------------|-------------|
| P(1)-V(1)-P(2)-C(17) | 7.76(17)    |
| N(1)-V(1)-O(1)-C(13) | -165.1(2)   |
| N(3)-V(1)-O(1)-C(13) | 26.5(2)     |
| S(1)-V(1)-O(1)-C(13) | 99.8(2)     |
| P(2)-V(1)-O(1)-C(13) | -67.9(2)    |
| P(1)-V(1)-O(1)-C(13) | -67.3(3)    |
| O(1)-V(1)-N(1)-N(2)  | -45.9(10)   |
| N(3)-V(1)-N(1)-N(2)  | 27.3(13)    |
| S(1)-V(1)-N(1)-N(2)  | 74.0(10)    |
| P(2)-V(1)-N(1)-N(2)  | -129.0(10)  |
| P(1)-V(1)-N(1)-N(2)  | 156.2(10)   |
| V(1)-N(1)-N(2)-C(15) | -125.5(9)   |
| V(1)-N(1)-N(2)-C(14) | 69.5(11)    |
| N(1)-V(1)-N(3)-C(7)  | -89.4(5)    |
| O(1)-V(1)-N(3)-C(7)  | -15.1(2)    |
| S(1)-V(1)-N(3)-C(7)  | -137.0(2)   |
| P(2)-V(1)-N(3)-C(7)  | 67.1(2)     |
| P(1)-V(1)-N(3)-C(7)  | 142.5(2)    |
| N(1)-V(1)-N(3)-C(6)  | 81.6(5)     |
| O(1)-V(1)-N(3)-C(6)  | 155.85(18)  |
| S(1)-V(1)-N(3)-C(6)  | 33.94(16)   |
| P(2)-V(1)-N(3)-C(6)  | -121.89(17) |
| P(1)-V(1)-N(3)-C(6)  | -46.56(17)  |
| V(1)-S(1)-C(1)-C(6)  | 20.3(2)     |
| V(1)-S(1)-C(1)-C(2)  | -155.8(2)   |
| C(6)-C(1)-C(2)-C(3)  | -1.5(4)     |
| S(1)-C(1)-C(2)-C(3)  | 174.6(2)    |
| C(1)-C(2)-C(3)-C(4)  | 0.3(4)      |
| C(2)-C(3)-C(4)-C(5)  | 0.7(4)      |
| C(3)-C(4)-C(5)-C(6)  | -0.5(4)     |
| C(4)-C(5)-C(6)-C(1)  | -0.7(4)     |
| C(4)-C(5)-C(6)-N(3)  | -179.1(2)   |
| C(2)-C(1)-C(6)-C(5)  | 1.7(4)      |
| S(1)-C(1)-C(6)-C(5)  | -174.5(2)   |
| C(2)-C(1)-C(6)-N(3)  | -179.7(2)   |
| S(1)-C(1)-C(6)-N(3)  | 4.1(3)      |

|                         |            |
|-------------------------|------------|
| C(7)-N(3)-C(6)-C(5)     | -40.4(4)   |
| V(1)-N(3)-C(6)-C(5)     | 147.7(2)   |
| C(7)-N(3)-C(6)-C(1)     | 141.1(2)   |
| V(1)-N(3)-C(6)-C(1)     | -30.8(3)   |
| C(6)-N(3)-C(7)-C(8)     | -169.3(2)  |
| V(1)-N(3)-C(7)-C(8)     | 1.5(4)     |
| N(3)-C(7)-C(8)-C(9)     | -174.6(3)  |
| N(3)-C(7)-C(8)-C(13)    | 11.7(4)    |
| C(13)-C(8)-C(9)-C(10)   | -1.0(4)    |
| C(7)-C(8)-C(9)-C(10)    | -174.9(3)  |
| C(8)-C(9)-C(10)-C(11)   | 0.8(4)     |
| C(9)-C(10)-C(11)-C(12)  | -0.1(4)    |
| C(10)-C(11)-C(12)-C(13) | -0.3(4)    |
| V(1)-O(1)-C(13)-C(12)   | 160.11(19) |
| V(1)-O(1)-C(13)-C(8)    | -22.5(4)   |
| C(11)-C(12)-C(13)-O(1)  | 177.7(2)   |
| C(11)-C(12)-C(13)-C(8)  | 0.2(4)     |
| C(9)-C(8)-C(13)-O(1)    | -176.9(2)  |
| C(7)-C(8)-C(13)-O(1)    | -3.2(4)    |
| C(9)-C(8)-C(13)-C(12)   | 0.5(4)     |
| C(7)-C(8)-C(13)-C(12)   | 174.2(2)   |
| C(19)-P(1)-C(16)-C(17)  | -75.9(3)   |
| C(18)-P(1)-C(16)-C(17)  | 176.4(3)   |
| V(1)-P(1)-C(16)-C(17)   | 51.5(3)    |
| P(1)-C(16)-C(17)-P(2)   | -44.8(4)   |
| C(20)-P(2)-C(17)-C(16)  | -103.4(3)  |
| C(21)-P(2)-C(17)-C(16)  | 148.6(3)   |
| V(1)-P(2)-C(17)-C(16)   | 19.8(3)    |

---

Symmetry transformations used to generate equivalent atoms:

Electronic Supplementary Information for Dalton Transactions  
This journal is © The Royal Society of Chemistry 2008
